# Supplementary material
Source: Research Square preprint supplement (doi:10.21203/rs.3.rs-9686857/v1)
Supplement: Supplementary file 1 [file 744420ec8b9c150c75dcc684.docx]

| **S. No** | **Genotypes** | **DE** | **DFLE** | **NL** | **NS** | **VL** | **NSB** | **SG** | **IL** | **LWD** | **PL** | **TL** | **TD** | **NTPV** | **WT** | **TYPV** | **SC** | **TSS** | **AA** | **MC** | **TS** | **TP** | **DM** |
| --- | --- | --- | --- | --- | --- | --- | --- | --- | --- | --- | --- | --- | --- | --- | --- | --- | --- | --- | --- | --- | --- | --- | --- |
|  | MPY-1 | 16.79 | 19.76 | 32.61 | 1.58 | 376.75 | 3.39 | 4.53 | 13.08 | 10.07 | 10.31 | 27.97 | 7.62 | 1.52 | 1.23 | 2.17 | 53.84 | 5.07 | 14.97 | 60.36 | 7.50 | 91.20 | 36.83 |
|  | MPY-2 | 23.05 | 26.21 | 25.00 | 1.79 | 337.42 | 2.31 | 3.99 | 14.76 | 10.75 | 10.87 | 25.09 | 6.94 | 1.68 | 1.01 | 1.79 | 51.03 | 8.27 | 14.80 | 67.80 | 7.12 | 90.80 | 31.32 |
|  | MPY-3 | 25.37 | 28.80 | 37.02 | 2.15 | 388.56 | 3.58 | 4.18 | 12.75 | 9.95 | 10.18 | 28.89 | 7.80 | 1.34 | 1.46 | 2.40 | 56.67 | 1.65 | 21.71 | 63.30 | 6.77 | 92.25 | 34.44 |
|  | MPY-4 | 20.19 | 24.04 | 29.51 | 2.05 | 361.62 | 3.13 | 3.58 | 11.30 | 9.76 | 8.74 | 26.57 | 7.42 | 1.60 | 1.23 | 2.01 | 58.40 | 9.35 | 24.49 | 60.76 | 6.71 | 93.19 | 38.62 |
|  | MPY-5 | 23.93 | 28.42 | 19.41 | 1.40 | 259.23 | 2.79 | 3.04 | 14.16 | 9.05 | 10.15 | 22.96 | 5.93 | 2.21 | 0.52 | 1.09 | 51.38 | 7.51 | 22.47 | 65.71 | 2.50 | 90.67 | 31.90 |
|  | MPY-6 | 17.94 | 23.81 | 42.76 | 1.71 | 416.91 | 4.35 | 3.56 | 13.72 | 12.38 | 12.03 | 32.39 | 8.38 | 1.40 | 1.86 | 2.94 | 45.28 | 11.72 | 13.28 | 63.71 | 4.70 | 93.35 | 34.15 |
|  | MPY-7 | 15.92 | 19.70 | 33.30 | 1.76 | 377.92 | 3.54 | 3.88 | 14.73 | 10.53 | 9.89 | 28.09 | 7.54 | 1.59 | 1.24 | 2.12 | 57.66 | 8.83 | 14.40 | 60.53 | 7.58 | 92.19 | 35.23 |
|  | MPY-8 | 14.05 | 18.57 | 30.37 | 1.66 | 370.07 | 3.23 | 3.69 | 11.26 | 9.25 | 8.44 | 26.98 | 7.38 | 1.55 | 1.21 | 2.05 | 62.87 | 10.13 | 16.85 | 63.75 | 8.45 | 93.31 | 34.64 |
|  | MPY-9 | 15.49 | 18.87 | 19.50 | 2.29 | 259.31 | 2.83 | 4.31 | 11.48 | 9.53 | 8.92 | 21.75 | 5.77 | 2.44 | 0.41 | 1.06 | 53.70 | 8.35 | 14.70 | 62.33 | 5.72 | 92.50 | 35.44 |
|  | MPY-10 | 15.05 | 20.47 | 28.64 | 1.82 | 364.15 | 2.89 | 4.57 | 13.94 | 8.42 | 7.73 | 26.50 | 7.39 | 1.68 | 1.12 | 1.93 | 56.19 | 8.15 | 14.57 | 62.38 | 7.34 | 91.40 | 36.90 |
|  | MPY-11 | 17.79 | 21.78 | 26.18 | 1.52 | 344.96 | 2.85 | 5.45 | 15.12 | 8.11 | 8.35 | 25.78 | 7.26 | 1.75 | 1.08 | 1.87 | 61.17 | 11.83 | 23.43 | 61.99 | 7.51 | 91.35 | 37.20 |
|  | MPY-12 | 14.41 | 18.66 | 37.12 | 2.44 | 387.03 | 4.21 | 4.21 | 14.21 | 11.33 | 10.96 | 30.59 | 8.05 | 1.39 | 1.73 | 2.60 | 60.76 | 9.41 | 16.30 | 66.45 | 6.73 | 90.91 | 34.47 |
|  | MPY-13 | 24.12 | 26.99 | 33.66 | 2.05 | 377.44 | 3.79 | 5.13 | 13.93 | 10.50 | 10.04 | 30.01 | 8.00 | 1.36 | 1.43 | 2.44 | 55.30 | 9.50 | 14.52 | 65.20 | 5.17 | 92.39 | 33.52 |
|  | TGy-12-2 | 22.56 | 25.02 | 21.07 | 2.43 | 301.22 | 2.81 | 4.81 | 12.58 | 7.24 | 7.75 | 24.20 | 6.71 | 1.97 | 0.81 | 1.21 | 54.52 | 10.64 | 16.55 | 60.67 | 5.47 | 91.20 | 35.92 |
|  | TGy-12-3 | 15.80 | 19.59 | 34.63 | 1.93 | 381.04 | 3.61 | 4.82 | 14.90 | 11.44 | 11.19 | 28.37 | 7.50 | 1.51 | 1.27 | 2.18 | 62.72 | 11.71 | 17.10 | 69.53 | 6.82 | 90.14 | 29.35 |
|  | TGy-12-6 | 14.49 | 17.37 | 34.65 | 2.12 | 381.20 | 3.50 | 4.84 | 14.07 | 10.57 | 11.20 | 28.93 | 7.72 | 1.41 | 1.31 | 2.32 | 53.55 | 8.10 | 15.28 | 72.92 | 7.71 | 90.12 | 30.41 |
|  | TGy-14-3 | 14.78 | 19.62 | 24.43 | 1.81 | 327.61 | 2.80 | 4.82 | 10.83 | 8.71 | 9.24 | 25.09 | 6.84 | 1.80 | 0.98 | 1.79 | 48.48 | 9.41 | 20.20 | 56.94 | 7.55 | 92.25 | 41.29 |
|  | TGy-14-4 | 16.80 | 20.02 | 23.93 | 2.08 | 334.37 | 2.76 | 3.03 | 12.77 | 12.31 | 9.49 | 24.76 | 6.99 | 1.76 | 0.98 | 1.69 | 58.72 | 11.10 | 19.60 | 64.44 | 8.55 | 90.28 | 35.23 |
|  | TGy-14-5 | 21.02 | 24.47 | 19.95 | 1.71 | 276.89 | 2.79 | 3.86 | 14.57 | 9.24 | 8.99 | 24.47 | 6.31 | 2.03 | 0.71 | 1.30 | 51.30 | 8.85 | 23.36 | 64.16 | 6.46 | 91.30 | 35.85 |
|  | TGy-14-7 | 16.81 | 19.76 | 18.09 | 1.49 | 254.96 | 2.71 | 4.22 | 14.31 | 7.63 | 6.87 | 22.31 | 4.83 | 2.31 | 0.75 | 1.09 | 55.08 | 7.17 | 17.22 | 61.78 | 7.28 | 92.30 | 31.07 |
|  | TGy-14-8 | 19.98 | 24.57 | 37.17 | 2.29 | 387.18 | 3.92 | 3.96 | 13.21 | 12.23 | 12.50 | 30.37 | 8.04 | 1.42 | 1.49 | 2.42 | 61.30 | 8.50 | 14.30 | 69.87 | 8.71 | 91.70 | 28.54 |
|  | TGy-14-9 | 22.15 | 25.72 | 46.26 | 1.75 | 426.65 | 4.37 | 4.82 | 15.11 | 12.15 | 11.81 | 34.90 | 8.65 | 1.26 | 2.08 | 3.15 | 55.38 | 8.54 | 18.97 | 57.24 | 9.16 | 92.78 | 40.66 |
|  | TGy-14-11 | 24.12 | 28.25 | 37.06 | 2.30 | 386.07 | 3.57 | 4.82 | 10.20 | 8.52 | 8.73 | 29.79 | 7.96 | 1.43 | 1.39 | 2.42 | 56.45 | 13.24 | 24.24 | 61.45 | 5.63 | 92.83 | 35.26 |
|  | TGy-17-2 | 12.35 | 16.34 | 26.50 | 2.28 | 350.09 | 2.92 | 4.21 | 13.74 | 9.02 | 9.68 | 26.60 | 7.35 | 1.81 | 1.16 | 1.95 | 58.52 | 7.29 | 14.32 | 63.72 | 6.37 | 92.64 | 34.02 |
|  | TGy-17-3 | 15.40 | 18.92 | 17.22 | 2.28 | 249.90 | 2.73 | 4.62 | 13.00 | 9.73 | 8.51 | 24.09 | 6.13 | 2.21 | 0.68 | 1.21 | 55.56 | 8.14 | 21.30 | 62.51 | 5.41 | 91.41 | 38.40 |
|  | TGy-17-4 | 16.92 | 20.55 | 42.03 | 1.70 | 407.72 | 4.18 | 4.20 | 14.79 | 12.19 | 12.26 | 31.78 | 8.39 | 1.33 | 1.82 | 2.89 | 48.65 | 8.58 | 20.79 | 65.62 | 6.73 | 92.54 | 34.17 |
|  | TGy-17-8 | 13.78 | 17.86 | 39.24 | 1.69 | 393.79 | 3.93 | 4.21 | 12.13 | 12.25 | 12.15 | 30.54 | 8.12 | 1.34 | 1.54 | 2.57 | 60.07 | 9.29 | 14.84 | 70.83 | 8.62 | 91.45 | 29.57 |
|  | TGy-17-9 | 22.10 | 25.19 | 21.80 | 1.90 | 306.95 | 2.82 | 3.65 | 13.46 | 10.17 | 10.50 | 25.66 | 6.93 | 1.93 | 1.02 | 1.80 | 57.45 | 11.06 | 15.16 | 61.17 | 5.32 | 90.84 | 36.27 |
|  | Sree Kartika | 23.14 | 26.85 | 41.92 | 2.09 | 407.74 | 4.75 | 5.46 | 15.61 | 14.06 | 11.90 | 34.00 | 9.12 | 1.29 | 2.27 | 3.14 | 54.92 | 9.72 | 21.40 | 68.63 | 8.48 | 94.58 | 31.40 |
|  | Jai White | 22.41 | 26.36 | 27.07 | 2.03 | 353.99 | 2.95 | 3.65 | 15.97 | 10.20 | 9.07 | 25.32 | 6.96 | 1.59 | 1.53 | 1.81 | 60.78 | 8.09 | 19.65 | 59.45 | 8.48 | 92.51 | 38.76 |
|  | GM | 18.62 | 22.42 | 30.27 | 1.94 | 351.62 | 3.33 | 4.27 | 13.52 | 10.24 | 9.95 | 27.49 | 7.34 | 1.66 | 1.24 | 2.05 | 55.92 | 9.07 | 18.03 | 63.84 | 6.89 | 91.88 | 34.69 |
|  | SE | 0.51 | 0.65 | 0.86 | 0.06 | 10.14 | 0.09 | 0.12 | 0.46 | 0.26 | 0.27 | 0.72 | 0.23 | 0.05 | 0.05 | 0.06 | 0.69 | 0.11 | 0.41 | 0.68 | 0.16 | 0.42 | 0.45 |
|  | CD5% | 1.42 | 1.83 | 2.41 | 0.17 | 28.39 | 0.25 | 0.33 | 1.29 | 0.73 | 0.74 | 2.01 | 0.64 | 0.14 | 0.13 | 0.17 | 1.92 | 0.30 | 1.16 | 1.91 | 0.44 | 1.19 | 1.26 |
|  | CD1% | 1.88 | 2.42 | 3.18 | 0.23 | 37.55 | 0.33 | 0.44 | 1.71 | 0.97 | 0.98 | 2.65 | 0.84 | 0.19 | 0.17 | 0.22 | 2.54 | 0.40 | 1.53 | 2.53 | 0.58 | 1.57 | 1.66 |
|  | CV | 6.69 | 7.13 | 6.95 | 7.76 | 7.06 | 6.53 | 6.76 | 8.37 | 6.27 | 6.54 | 6.39 | 7.60 | 7.36 | 9.17 | 7.15 | 3.01 | 2.92 | 5.62 | 2.62 | 5.54 | 1.13 | 3.17 |

**Table S1.** Pooled mean performance of growth, yield and quality attributes of greater yam across 30 genotypes

**Note:** DE (Days to Emergence), DFLE (Days to First Leaf Emergence), NL (Number of Leaves at 30 DAE), NS (Number of Sprouts per Seed Tuber), VL (Vine Length at Harvest, cm), NSB (Number of Secondary Branches per Vine), SG (Stem Girth, cm), IL (Internode Length, cm), LWD (Leaf Width, cm), PL (Petiole Length, cm), TL (Tuber Length, cm), TD (Tuber Diameter, cm), NTPV (Number of Tubers per Vine), WT (Weight of Tuber, kg), TYPV (Tuber Yield per Vine, kg), SC (Starch Content, g/100g), TSS (Total Soluble Solids, °Brix), AA (Ascorbic Acid, mg/100g), MC (Moisture Content, %), TS (Total Sugar, g/100g FW), TP (Total Phenol, mg/100g), DM (Dry Matter, %)

**Table S2.** Variability parameters of different characters of greater yam

| **S. No** | **Character** | **GCV (%)** | **PCV (%)** | **ECV (%)** | **h² (%)** | **GA** | **GG (%)** |
| --- | --- | --- | --- | --- | --- | --- | --- |
|  | Days to emergence | 20.47 | 21.78 | 6.69 | 88.32 | 7.38 | 39.62 |
|  | Days to leaf emergence | 16.46 | 17.96 | 7.13 | 84.06 | 6.97 | 31.09 |
|  | No. of leaves (30 DAE) | 26.30 | 28.80 | 6.95 | 83.39 | 14.98 | 49.48 |
|  | No. of sprouts | 14.49 | 16.85 | 7.76 | 73.96 | 0.50 | 25.68 |
|  | Vine length at harvest (cm) | 14.40 | 15.69 | 7.06 | 84.28 | 95.78 | 27.24 |
|  | No. of secondary branches | 18.60 | 19.70 | 6.53 | 89.11 | 1.21 | 36.17 |
|  | Stem girth (cm) | 14.61 | 15.62 | 6.76 | 87.47 | 1.20 | 28.15 |
|  | Internode length (cm) | 10.81 | 12.83 | 8.37 | 70.99 | 2.54 | 18.77 |
|  | Leaf width (cm) | 15.84 | 16.78 | 6.27 | 89.06 | 3.15 | 30.79 |
|  | Petiole length (cm) | 15.19 | 16.11 | 6.54 | 88.88 | 2.93 | 29.50 |
|  | Tuber length (cm) | 11.56 | 13.90 | 6.39 | 69.21 | 5.45 | 19.82 |
|  | Tuber diameter (cm) | 12.47 | 14.07 | 7.60 | 78.56 | 1.67 | 22.77 |
|  | No. of tubers per vine | 19.40 | 20.75 | 7.36 | 87.48 | 0.62 | 37.39 |
|  | Weight of tuber (kg) | 33.40 | 37.59 | 9.17 | 78.93 | 0.76 | 61.13 |
|  | Tuber yield per vine (kg) | 28.43 | 30.62 | 7.15 | 86.22 | 1.11 | 54.38 |
|  | Starch content (g/100g) | 7.70 | 8.23 | 3.01 | 87.59 | 8.31 | 14.85 |
|  | TSS (°Brix) | 24.23 | 24.40 | 2.92 | 98.60 | 4.45 | 49.56 |
|  | Ascorbic acid (mg/100g) | 19.56 | 20.29 | 5.62 | 92.96 | 7.00 | 38.85 |
|  | Moisture (%) | 5.98 | 6.51 | 2.62 | 84.29 | 7.21 | 11.30 |
|  | Total sugar (g/100 g FW) | 21.11 | 21.73 | 5.54 | 94.39 | 2.91 | 42.26 |
|  | Total phenol (mg/100g) | 1.07 | 1.55 | 1.13 | 47.41 | 1.39 | 1.52 |
|  | Dry matter (%) | 9.21 | 9.79 | 3.17 | 88.57 | 6.20 | 17.86 |

**Note:** GCV (Genotypic Coefficient of Variation, %), PCV (Phenotypic Coefficient of Variation, %), ECV (Environmental Coefficient of Variation, %), h² (Heritability in Broad Sense, %), GA (Genetic Advance), GG (Genetic Gain, %)

**TableS3.** Genotypic path analysis for tuber yield per vine (kg) in greater yam

| **SN** | **Character** | **DE** | **DFE** | **NOL** | **NOS** | **VL** | **NSB** | **SG** | **IL** | **LW** | **PL** | **TL** | **TD** | **NT** | **WT** | **SC** | **TSS** | **AA** | **Moisture** | **Total sugar** | **Total phenol** | **Dry matter** | r |
| --- | --- | --- | --- | --- | --- | --- | --- | --- | --- | --- | --- | --- | --- | --- | --- | --- | --- | --- | --- | --- | --- | --- | --- |
| 1 | DE | **0.244** | -0.181 | -0.006 | -0.003 | 0.014 | -0.005 | 0.000 | -0.002 | 0.002 | 0.009 | 0.091 | -0.066 | -0.016 | -0.016 | -0.008 | -0.001 | -0.011 | -0.061 | 0.026 | 0.041 | 0.018 | 0.071 |
| 2 | DFE | 0.240 | -**0.184** | -0.011 | -0.001 | 0.076 | -0.009 | -0.003 | -0.002 | 0.003 | 0.013 | 0.132 | -0.102 | -0.022 | -0.022 | -0.009 | 0.000 | -0.011 | -0.067 | 0.027 | 0.055 | 0.025 | 0.131 |
| 3 | NOL | 0.017 | -0.024 | **-0.082** | -0.001 | 0.994 | -0.084 | 0.015 | -0.002 | 0.050 | 0.106 | 0.757 | -0.620 | -0.125 | -0.107 | 0.002 | 0.001 | 0.003 | 0.129 | -0.036 | 0.091 | -0.094 | 0.9903** |
| 4 | NOS | 0.014 | -0.004 | -0.002 | **-0.045** | 0.037 | -0.010 | 0.011 | 0.003 | 0.004 | -0.001 | 0.030 | -0.094 | -0.009 | -0.004 | 0.013 | 0.001 | 0.002 | 0.062 | 0.002 | 0.002 | -0.003 | 0.010 |
| 5 | VL | 0.003 | -0.014 | -0.079 | -0.002 | **1.033** | -0.069 | 0.013 | -0.002 | 0.044 | 0.090 | 0.711 | -0.622 | -0.130 | -0.104 | 0.007 | 0.002 | 0.004 | 0.104 | -0.043 | 0.073 | -0.057 | 0.9622** |
| 6 | NSB | 0.014 | -0.019 | -0.081 | -0.005 | 0.846 | **-0.085** | 0.016 | -0.002 | 0.054 | 0.103 | 0.785 | -0.567 | -0.106 | -0.108 | 0.000 | 0.002 | 0.003 | 0.140 | -0.022 | 0.099 | -0.108 | 0.9577** |
| 7 | SG | -0.002 | 0.009 | -0.021 | -0.009 | 0.235 | -0.023 | **0.058** | -0.001 | -0.006 | -0.003 | 0.251 | -0.196 | -0.031 | -0.030 | 0.001 | 0.002 | -0.001 | 0.013 | -0.017 | 0.034 | 0.021 | 0.285 |
| 8 | IL | 0.037 | -0.024 | -0.013 | 0.013 | 0.142 | -0.017 | 0.006 | **-0.012** | 0.024 | 0.041 | 0.170 | -0.088 | -0.019 | -0.037 | 0.000 | -0.002 | 0.002 | 0.096 | -0.013 | -0.030 | -0.086 | 0.191 |
| 9 | LW | 0.006 | -0.009 | -0.057 | -0.003 | 0.625 | -0.063 | -0.005 | -0.004 | **0.073** | 0.123 | 0.562 | -0.444 | -0.081 | -0.082 | 0.000 | 0.002 | 0.005 | 0.223 | -0.034 | 0.036 | -0.152 | 0.7213** |
| 10 | PL | 0.015 | -0.017 | -0.061 | 0.000 | 0.656 | -0.062 | -0.001 | -0.003 | 0.063 | **0.142** | 0.591 | -0.460 | -0.085 | -0.078 | -0.006 | 0.000 | 0.007 | 0.251 | -0.016 | 0.002 | -0.191 | 0.7472** |
| 11 | TL | 0.029 | -0.032 | -0.082 | -0.002 | 0.966 | -0.088 | 0.019 | -0.003 | 0.054 | 0.111 | **0.760** | -0.637 | -0.123 | -0.108 | 0.000 | 0.002 | 0.003 | 0.137 | -0.033 | 0.092 | -0.079 | 0.9871** |
| 12 | TD | 0.025 | -0.029 | -0.077 | -0.006 | 0.979 | -0.073 | 0.018 | -0.002 | 0.049 | 0.100 | 0.739 | **-0.656** | -0.125 | -0.105 | 0.004 | 0.003 | 0.002 | 0.126 | -0.033 | 0.077 | -0.047 | 0.9677** |
| 13 | NT | -0.029 | 0.030 | 0.078 | 0.003 | -1.013 | 0.068 | -0.014 | 0.002 | -0.044 | -0.092 | -0.706 | 0.619 | **0.132** | 0.105 | -0.008 | -0.001 | -0.002 | -0.131 | 0.043 | -0.057 | 0.069 | -0.9486** |
| 14 | WT | 0.034 | -0.036 | -0.079 | -0.002 | 0.963 | -0.081 | 0.016 | -0.004 | 0.053 | 0.099 | 0.731 | -0.615 | -0.124 | **-0.112** | 0.003 | 0.002 | 0.001 | 0.098 | -0.044 | 0.110 | -0.043 | 0.9706** |
| 15 | SC | -0.040 | 0.034 | -0.003 | -0.012 | 0.152 | 0.000 | 0.002 | 0.000 | 0.000 | -0.019 | 0.004 | -0.058 | -0.022 | -0.007 | **0.048** | 0.002 | 0.001 | 0.067 | -0.040 | -0.025 | -0.060 | 0.022 |
| 16 | TSS | -0.015 | 0.004 | -0.004 | -0.003 | 0.085 | -0.007 | 0.006 | 0.001 | 0.005 | -0.002 | 0.081 | -0.095 | -0.006 | -0.009 | 0.006 | **0.020** | -0.002 | 0.015 | 0.007 | 0.003 | 0.004 | 0.095 |
| 17 | AA | 0.096 | -0.074 | 0.009 | 0.003 | -0.166 | 0.009 | 0.003 | 0.001 | -0.012 | -0.036 | -0.069 | 0.054 | 0.011 | 0.005 | -0.001 | 0.001 | -**0.027** | -0.114 | 0.009 | 0.038 | 0.161 | -0.101 |
| 18 | MC | -0.033 | 0.027 | -0.023 | -0.006 | 0.234 | -0.026 | 0.002 | -0.003 | 0.036 | 0.078 | 0.229 | -0.182 | -0.038 | -0.024 | 0.007 | 0.001 | 0.007 | **0.456** | -0.006 | -0.070 | -0.397 | 0.269 |
| 19 | TS | -0.068 | 0.054 | -0.031 | 0.001 | 0.480 | -0.020 | 0.011 | -0.002 | 0.026 | 0.024 | 0.271 | -0.235 | -0.060 | -0.053 | 0.021 | -0.001 | 0.002 | 0.030 | **-0.093** | 0.033 | 0.008 | 0.3972* |
| 20 | TP | 0.048 | -0.048 | -0.036 | 0.000 | 0.358 | -0.040 | 0.009 | 0.002 | 0.012 | 0.001 | 0.332 | -0.241 | -0.036 | -0.059 | -0.006 | 0.000 | -0.005 | -0.153 | -0.015 | **0.210** | 0.106 | 0.4413* |
| 21 | DM | 0.010 | -0.011 | 0.017 | 0.000 | -0.134 | 0.021 | 0.003 | 0.002 | -0.025 | -0.061 | -0.135 | 0.070 | 0.021 | 0.011 | -0.007 | 0.000 | -0.010 | -0.409 | -0.002 | 0.051 | **0.442** | -0.145 |

Residual = 0.0397

*, ** Significant correlation with dependent char at 5% and 1%, respectively

(To be continued…)

Phenotypic path analysis for tuber yield per vine (kg) in greater yam

| **SN** | **Character** | **DFE** | **DLE** | **NOL** | **NOS** | **VL** | **NSB** | **SG** | **IL** | **LW** | **PL** | **TL** | **TD** | **NT** | **WT** | **SC** | **TSS** | **AA** | **Moisture** | **Total sugar** | **Total phenol** | **Dry matter** | **r** |
| --- | --- | --- | --- | --- | --- | --- | --- | --- | --- | --- | --- | --- | --- | --- | --- | --- | --- | --- | --- | --- | --- | --- | --- |
| 1 | DE | **0.001** | -0.059 | 0.006 | -0.006 | 0.014 | -0.009 | 0.004 | -0.016 | 0.007 | 0.006 | 0.057 | 0.009 | 0.006 | 0.053 | 0.001 | 0.000 | 0.002 | 0.002 | 0.014 | 0.002 | 0.000 | 0.094 |
| 2 | DFE | 0.001 | **-0.060** | 0.010 | -0.006 | 0.026 | -0.014 | 0.004 | -0.018 | 0.011 | 0.008 | 0.082 | 0.013 | 0.008 | 0.071 | 0.001 | 0.000 | 0.002 | 0.002 | 0.013 | 0.003 | 0.000 | 0.157 |
| 3 | NOL | 0.000 | -0.009 | **0.064** | -0.005 | 0.137 | -0.071 | 0.015 | -0.015 | 0.061 | 0.034 | 0.335 | 0.044 | 0.110 | 0.286 | 0.000 | 0.000 | 0.000 | -0.006 | -0.026 | 0.005 | 0.000 | 0.9583** |
| 4 | NOS | 0.000 | -0.007 | 0.007 | **-0.052** | 0.026 | -0.013 | 0.015 | 0.001 | 0.014 | 0.005 | 0.073 | 0.014 | -0.005 | 0.051 | -0.002 | -0.001 | 0.000 | -0.003 | -0.003 | 0.001 | 0.000 | 0.121 |
| 5 | VL | 0.000 | -0.011 | 0.059 | -0.009 | **0.148** | -0.065 | 0.017 | -0.020 | 0.058 | 0.032 | 0.320 | 0.047 | 0.105 | 0.278 | -0.001 | -0.001 | 0.000 | -0.005 | -0.034 | 0.004 | 0.000 | 0.9224** |
| 6 | NSB | 0.000 | -0.010 | 0.055 | -0.008 | 0.117 | **-0.082** | 0.018 | -0.020 | 0.065 | 0.035 | 0.312 | 0.041 | 0.086 | 0.263 | 0.000 | -0.001 | 0.000 | -0.006 | -0.019 | 0.006 | 0.000 | 0.8497** |
| 7 | SG | 0.000 | -0.004 | 0.018 | -0.015 | 0.048 | -0.027 | **0.053** | -0.018 | 0.003 | 0.004 | 0.137 | 0.020 | 0.015 | 0.092 | 0.000 | -0.001 | 0.000 | -0.001 | -0.017 | 0.002 | 0.000 | 0.310 |
| 8 | IL | 0.000 | -0.016 | 0.014 | 0.001 | 0.044 | -0.023 | 0.014 | **-0.069** | 0.036 | 0.019 | 0.121 | 0.016 | -0.003 | 0.108 | 0.000 | 0.001 | 0.000 | -0.005 | -0.015 | -0.002 | 0.000 | 0.239 |
| 9 | LW | 0.000 | -0.008 | 0.044 | -0.008 | 0.095 | -0.060 | 0.002 | -0.028 | **0.090** | 0.042 | 0.260 | 0.035 | 0.066 | 0.221 | 0.000 | -0.001 | 0.000 | -0.010 | -0.027 | 0.002 | 0.000 | 0.7135** |
| 10 | PL | 0.000 | -0.011 | 0.046 | -0.006 | 0.099 | -0.060 | 0.005 | -0.027 | 0.078 | **0.048** | 0.267 | 0.036 | 0.067 | 0.207 | 0.001 | 0.000 | -0.001 | -0.011 | -0.015 | 0.000 | -0.001 | 0.7238** |
| 11 | TL | 0.000 | -0.014 | 0.060 | -0.011 | 0.132 | -0.071 | 0.020 | -0.023 | 0.065 | 0.035 | **0.360** | 0.046 | 0.093 | 0.290 | 0.000 | -0.001 | 0.000 | -0.005 | -0.024 | 0.005 | 0.000 | 0.9563** |
| 12 | TD | 0.000 | -0.016 | 0.056 | -0.015 | 0.140 | -0.067 | 0.021 | -0.022 | 0.062 | 0.034 | 0.328 | **0.050** | 0.094 | 0.275 | -0.001 | -0.001 | 0.000 | -0.006 | -0.027 | 0.004 | 0.000 | 0.9108** |
| 13 | NT | 0.000 | 0.004 | -0.051 | -0.002 | -0.112 | 0.051 | -0.006 | -0.002 | -0.043 | -0.023 | -0.242 | -0.034 | **-0.138** | -0.242 | 0.001 | 0.000 | 0.001 | 0.005 | 0.025 | -0.004 | 0.000 | -0.8121** |
| 14 | WT | 0.000 | -0.014 | 0.058 | -0.008 | 0.129 | -0.068 | 0.015 | -0.024 | 0.062 | 0.031 | 0.328 | 0.043 | 0.105 | **0.319** | -0.001 | -0.001 | 0.000 | -0.004 | -0.030 | 0.007 | 0.000 | 0.9479** |
| 15 | SC | 0.000 | 0.009 | 0.003 | -0.012 | 0.022 | -0.002 | 0.002 | -0.003 | 0.001 | -0.005 | 0.009 | 0.005 | 0.017 | 0.026 | **-0.007** | -0.001 | 0.000 | -0.004 | -0.028 | -0.001 | 0.000 | 0.031 |
| 16 | TSS | 0.000 | 0.000 | 0.003 | -0.003 | 0.013 | -0.007 | 0.006 | 0.005 | 0.007 | 0.000 | 0.036 | 0.007 | 0.005 | 0.025 | -0.001 | **-0.007** | 0.000 | -0.001 | 0.004 | 0.001 | 0.000 | 0.093 |
| 17 | AA | 0.001 | -0.026 | -0.005 | -0.001 | -0.011 | 0.003 | 0.006 | -0.003 | -0.009 | -0.008 | -0.008 | 0.001 | -0.020 | -0.004 | 0.000 | -0.001 | **0.004** | 0.004 | 0.003 | 0.003 | 0.001 | -0.071 |
| 18 | MC | 0.000 | 0.005 | 0.017 | -0.006 | 0.034 | -0.025 | 0.003 | -0.015 | 0.041 | 0.024 | 0.086 | 0.013 | 0.032 | 0.057 | -0.002 | -0.001 | -0.001 | **-0.022** | -0.006 | -0.003 | -0.001 | 0.233 |
| 19 | TS | 0.000 | 0.012 | 0.024 | -0.002 | 0.072 | -0.022 | 0.013 | -0.015 | 0.035 | 0.010 | 0.126 | 0.020 | 0.050 | 0.138 | -0.003 | 0.000 | 0.000 | -0.002 | **-0.070** | 0.002 | 0.000 | 0.3857* |
| 20 | TP | 0.000 | -0.009 | 0.016 | -0.001 | 0.031 | -0.025 | 0.005 | 0.007 | 0.009 | 0.000 | 0.090 | 0.011 | 0.026 | 0.106 | 0.000 | 0.000 | 0.001 | 0.003 | -0.006 | **0.020** | 0.000 | 0.283 |
| 21 | DM | 0.000 | -0.004 | -0.010 | -0.002 | -0.012 | 0.017 | 0.003 | 0.008 | -0.025 | -0.017 | -0.039 | -0.002 | -0.021 | -0.022 | 0.000 | 0.000 | 0.001 | 0.015 | -0.002 | 0.004 | **0.001** | -0.107 |

Residual = 0.1094 *, ** Significant correlation with dependent char at 5% and 1% respectively

**Table S4.** Intra and inter cluster distance in pooled analysis of greater yam

| **Cluster** | **I** | **II** | **III** | **IV** |
| --- | --- | --- | --- | --- |
| I | **194.60** | 239.78 | 333.99 | 266.88 |
| II |  | **136.53** | 400.62 | 251.36 |
| III |  |  | **0.00** | 218.47 |
| IV |  |  |  | **0.00** |

**Table S5**. Cluster means for twenty-two characters in pooled analysis of greater yam

| **Cluster** | **Days to emergence** | **Days to first leaf emergence** | **No. of leaves** | **No. of sprouts** | **Vine length at harvest** | **No. of secondary Branches** | **Stem girth** | **Internode length** | **Leaf width** | **Petiole length** | **Tuber length** | **Tuber diameter** | **No. of tuber per vine** | **Weight of tuber** | **Tuber yield per vine** | **Starch content** | **TSS** | **Ascorbic acid** | **Moisture** | **Total sugar** | **Total phenol** | **Dry matter** |
| --- | --- | --- | --- | --- | --- | --- | --- | --- | --- | --- | --- | --- | --- | --- | --- | --- | --- | --- | --- | --- | --- | --- |
| **I** | 18.34 | 22.06 | 27.90 | 1.99 | 337.77 | 3.20 | 4.22 | 13.62 | 10.21 | 9.83 | 26.65 | 7.12 | 1.74 | 1.15 | 1.89 | 56.24 | 9.02 | 17.57 | 64.44 | 6.82 | 91.67 | 34.25 |
| **II** | 18.83 | 23.11 | 37.44 | 1.77 | 392.06 | 3.76 | 4.42 | 13.37 | 10.43 | 10.27 | 30.27 | 8.01 | 1.45 | 1.57 | 2.55 | 54.97 | 10.67 | 19.59 | 62.30 | 7.03 | 92.69 | 36.01 |
| **III** | 25.37 | 28.80 | 37.02 | 2.15 | 388.56 | 3.58 | 4.18 | 12.75 | 9.95 | 10.18 | 28.89 | 7.80 | 1.34 | 1.46 | 2.40 | 56.67 | 1.65 | 21.71 | 63.30 | 6.77 | 92.25 | 34.44 |
| **IV** | 16.79 | 19.76 | 32.61 | 1.58 | 376.75 | 3.39 | 4.52 | 13.08 | 10.07 | 10.30 | 27.97 | 7.62 | 1.52 | 1.23 | 2.17 | 53.84 | 5.06 | 14.97 | 60.36 | 7.50 | 91.20 | 36.83 |
